# Supplementary material
Source: publisher site journal article supplement (https://www.dovepress.com/article/supplementary_file/612342/612342%20Supplementary%20Material.docx)
Supplement: Supplementary file 1 [file 612342%20Supplementary%20Material.docx]

**Translated Informed Consent Form**

Dear Participant:

We sincerely invite you to participate in a survey study regarding acne vulgaris (commonly known as acne or pimples) and the use of topical medications. Before you decide whether to participate, please read the following information carefully to help you understand the purpose, procedures, risks, and your rights in this study. Should you have any questions, please feel free to contact the research team.

1. Background and Purpose

Acne vulgaris is a common skin condition predominantly affecting adolescents and young adults, with topical medications serving as the mainstay of treatment. However, insufficient patient knowledge, unrealistic expectations, and excessive concerns about adverse effects often compromise therapeutic outcomes. This survey aims to investigate young patients’ perceptions of acne, their actual usage patterns of topical medications, and the factors influencing adherence, so as to provide evidence-based insights for clinical education and patient support.

2. Study Procedures

This study is conducted via an online questionnaire. If you agree to participate, you will be asked to complete a web-based survey covering your demographic information, acne history, knowledge about acne, topical medication use habits, and related attitudes. It will take approximately 15-20 minutes to complete the questionnaire.

3. Voluntary Participation and Withdrawal

Your participation is entirely voluntary. You have the right to decline participation or withdraw at any time during the survey without providing any reason. This will not result in any penalty or loss of benefits to which you are otherwise entitled.

4. Risks and Discomforts

This study involves only a questionnaire survey and does not involve any drugs, devices, or biological sample collection. No physical harm is anticipated. Some questions may touch upon personal feelings; if you feel uncomfortable, you may skip the question or withdraw at any time.

5. Benefits

While you may not receive direct personal benefit from this study, your participation will contribute to a better understanding of patients’ knowledge and behavior patterns regarding acne, providing valuable insights for improving treatment support and health education for acne patients.

6. Confidentiality

All information collected in this study will be kept strictly confidential. The questionnaire is anonymous; we do not collect any personally identifiable information such as your name, ID number, telephone number, or residential address. The data you provide will be used solely for academic research. Results may be published in scientific journals, but no personal identifying information will be disclosed. All data will be securely stored and accessible only to the research team.

7. Data Use and Storage

Your responses will be aggregated and analyzed for scientific research purposes only. Data will be stored in an encrypted database and will be disposed of in accordance with relevant regulations after the study is completed.

8. Informed Consent

By clicking the “I have read and agree to participate” button, you confirm that you have read and understood the above information, voluntarily consent to participate in this study.

Thank you for your support and cooperation!

**Survey Questionnaire on Acne Vulgaris Knowledge and Topical Medication Use**

This questionnaire was administered as part of a web-based, cross-sectional study investigating the knowledge, attitudes, and practices of young acne patients regarding topical medications in China. It is provided as a supplement to the manuscript (Manuscript ID: 612342).

1. Have you ever been diagnosed with or experienced acne vulgaris? (Single Choice)

□ Yes

□ No (If selected, the survey ended)

2. Have you ever used any topical medication (cream, gel, ointment) to treat your acne? (Single Choice)

□ Yes

□ No (If selected, the survey ended)

3. What is your age? ______ years old (Open-ended)

4. What is your gender? (Single Choice)

□ Male

□ Female

5. What is your skin type? (Single Choice)

□ Oily skin

□ Dry skin

□ Neutral skin

□ Mixed skin

□ Don’t know / Not sure

6. Do you have sensitive skin? (Single Choice)

□ Yes

□ No

7. Which of the following best describes your understanding of acne vulgaris? (Single Choice)

□It is a chronic skin condition that requires long-term management and is prone to recurrence.

□It is a short-term condition, but it requires proper treatment to heal quickly.

□It is a short-term condition that can resolve on its own without treatment.

□I don’t have a clear understanding of its nature.

8. In your opinion, what are the MAIN causes of acne vulgaris? (Multiple Choice)

□ Endocrine disorders (e.g., hormonal imbalance)

□ Personal lifestyle and habits (e.g., diet, sleep)

□ Oily skin and clogged pores

□ Bacterial infection

□ Genetic factors

□ Use of cosmetics or skincare products

□ Dietary factors (e.g., dairy, spicy foods)

□ Psychological stress

□ Environmental factors (e.g., pollution, climate)

□ Other (please specify): ____________

□ Don’t know

9. What distress has acne caused you? (Multiple Choice)

□ Dietary restrictions (e.g., avoiding spicy or sweet foods)

□ Restricted makeup application

□ Need for careful selection of skincare products

□ Emotional discomfort in public situations

□ Social withdrawal

□ Reduced career or academic performance

□ Feelings of inferiority, lack of confidence, helplessness, or anxiety about appearance

10. Which of the following topical medications have you used for acne? (Multiple Choice)

□ Adapalene

□ Tretinoin

□ Benzoyl Peroxide

□ Clindamycin

□ Erythromycin

□ Mupirocin

□ Fusidic acid

□ Azelaic Acid

□ Metronidazole

□ Traditional Chinese Medicine preparations

□ Others (please specify): ____________

11. Before you used a topical medication for the FIRST TIME, how did you decide which one to use? (Single Choice)

□ Consultation with a dermatologist (got a prescription or advice in a hospital/clinic)

□ Recommendation from a pharmacist or drug store assistant

□Searched for information on the Internet (e.g., search engines, social media, health websites)

□ Recommendation from family or friends

□ Other (please specify): ____________

□ Don’t remember

1. What is your level of understanding of the following information about the topical medications you have used?

Scale: Fully understand / Relatively understand / Relatively not understand / Completely not understand

a. Names and ingredients

b. Mechanism of action

c. Correct method of application

d. Specific effects

e. Possible side effects

f. Applicable age group

g. How long to use continuously before expecting results

h. When to start using

1. From which sources have you obtained information about acne and its treatment? (Multiple Choice)

□ Dermatologists in hospitals/clinics

□ Internet hospitals

□ Social media (e.g., Xiaohongshu, Douyin)

□ Online pharmacies

□ Pharmacies

□ Skin products specialty store

□ Relatives or friends

□ Others: ____________

14. Which of the following information sources about acne treatment do you trust the MOST? (Multiple Choice, max 3)

□ Dermatologists in hospitals

□ Pharmacists

□ Dermatologist bloggers/Key Opinion Leaders (KOLs) on social media

□ Scientific research bloggers/KOLs

□ Product review bloggers/KOLs

□ Friends or family with personal experience

□ Others: ____________

15. What information about topical acne medications are you MOST interested in knowing? (Multiple Choice)

□ Side effects and precautions

□ Correct method of use

□ Expected time to see results (onset time)

□ Recommended duration of use

□ How to combine with skincare products

□ Others: ____________

16. What was the PRIMARY method you used to apply the topical medication? (Single Choice)

□ Spot application: Applying only to individual lesion.

□ Large-area application: Spreading a thin layer over the entire affected area.

□ Other: ____________

17. Did you know that some medications (like retinoids) require building up skin tolerance when starting? (Single Choice)

□ Yes, and I knew how to do it.

□ Yes, but I did not know exactly how.

□ No, I was not aware.

18. What was your expected time for a topical medication to start showing improvement? (Single Choice)

□ Within 24 hours

□ 1-3 days

□ 4-7 days

□ 1.5 - 2 weeks

□ 3 - 4 weeks

□ More than 4 weeks

19. Thinking about the MOST RECENT time you used a topical medication for acne:

a) What type of medication did you use? (Single Choice)

□ Adapalene

□ Tretinoin

□ Benzoyl Peroxide

□ Clindamycin

□ Erythromycin

□ Mupirocin

□ Fusidic acid

□ Azelaic Acid

□ Metronidazole

□ Traditional Chinese Medicine preparations

□ Others (please specify): ____________

b) How long did you CONTINUOUSLY use it for? (Single Choice)

□ Less than 1 week

□ 1-2 weeks

□ 2-4 weeks

□ 4-8 weeks

□ Over 8 weeks

□ Don’t remember

20. What was the MAIN reason you stopped using the topical medication?(Single Choice)

□ It worked too slowly.

□ Poor efficacy.

□ I was concerned about or experienced adverse effects (e.g., irritation, dryness).

□ My skin cleared up, so I stopped.

□ It was inconvenient or I forgot to use it.

□ Other: ____________

21. After you stopped using the medication, did your acne recur within three months? (Single Choice)

□ Yes

□ No
